# Supplementary material for: Effect of PCBM nanoparticles in lead-based layered (PEA)2PbI4 perovskite thin films
Source: Royal Society of Chemistry journal article supplement (doi:10.1039/d4ya00338a), 2024-01-01
Supplement: d4ya00338a1.pdf [file d4ya00338a1.pdf]

## Supporting Information

### Effect of PCBM nanoparticles in Lead-based Layered $(\text{PEA})_2\text{PbI}_4$ Perovskite Thin Films

Deepak Aloysius,<sup>†</sup> Muskan Khan,<sup>†</sup> Arindam Mondal,<sup>†</sup> Satyajit Gupta<sup>\*†</sup>

<sup>†</sup>Department of Chemistry, Indian Institute of Technology Bhilai, Durg, Chhattisgarh,  
491002

\*Corresponding Author

Email: [satyajit@iitbhilai.ac.in](mailto:satyajit@iitbhilai.ac.in)

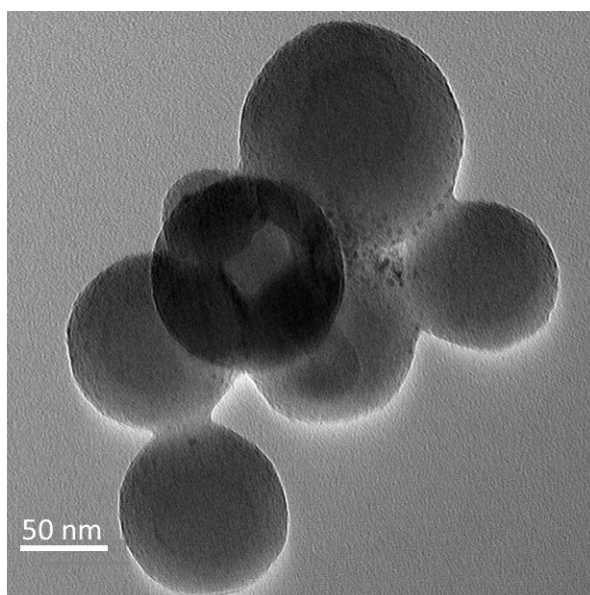

Fig. S1: TEM images of PCBM dispersed in DMF: DMSO solvent.

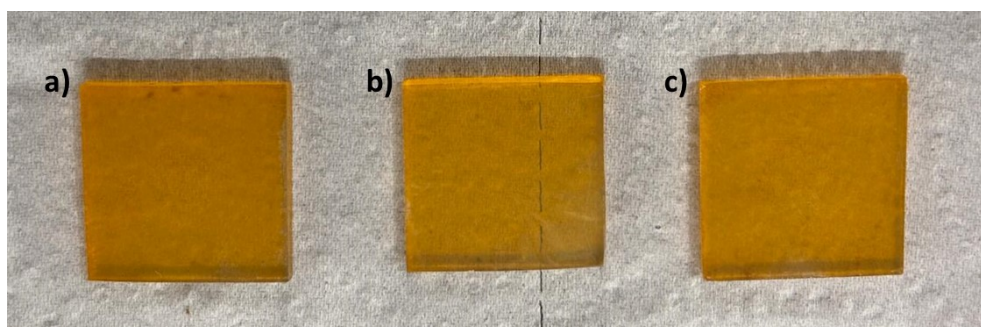

Fig. S2: Optical photographs of a)  $P_0$ , b)  $P_{0.5}$  and c)  $P_{0.75}$  thin film compositions fabricated over FTO substrates

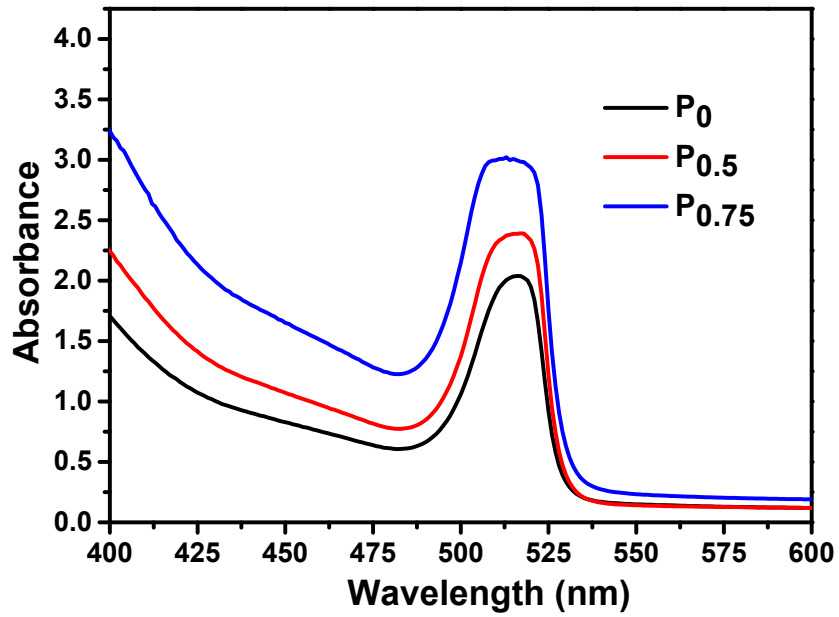

Fig. S3: Absorbance analyses of  $P_0$ ,  $P_{0.5}$ , and  $P_{0.75}$  compositions

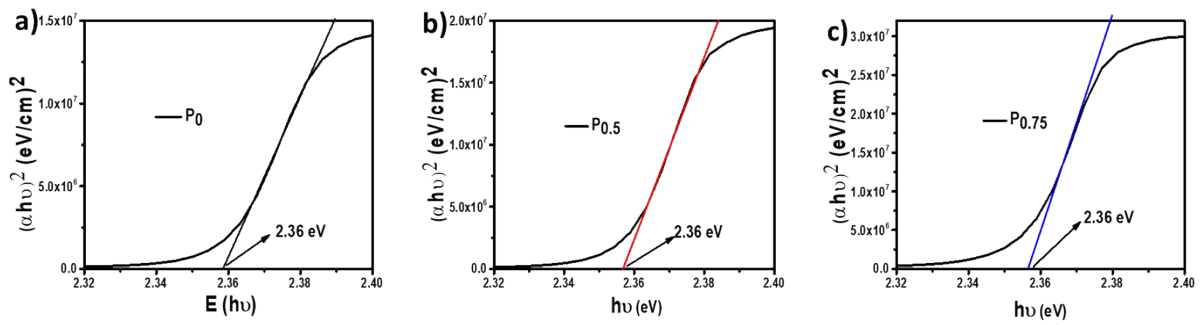

Fig. S4: Tauc plot analyses of a)  $P_0$ , b)  $P_{0.5}$ , and c)  $P_{0.75}$  compositions

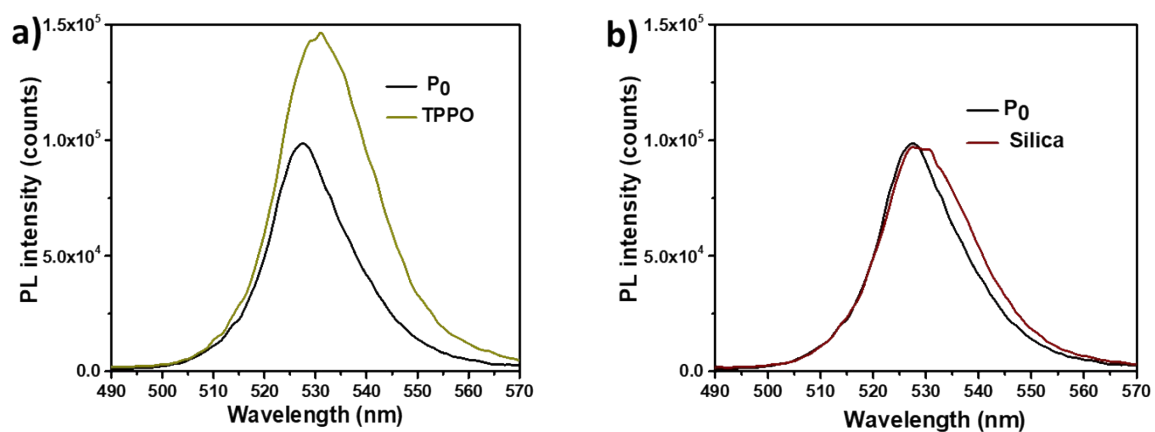

Fig. S5: SSPL data of a) TPPO mixed  $(\text{PEA})_4\text{PbI}_4$  and b) Silica mixed  $(\text{PEA})_2\text{PbI}_4$  in comparison with pristine  $(\text{PEA})_4\text{PbI}_4$ .

| Perovskite        | T1 (ns) | T2 (ns) | Chi sq. |
|-------------------|---------|---------|---------|
| P <sub>0</sub>    | 0.208   | 0.859   | 1.46    |
| P <sub>0.5</sub>  | 0.182   | 0.692   | 1.48    |
| P <sub>0.75</sub> | 0.173   | 0.767   | 1.15    |

Table S1: TRPL curve fitting data of P<sub>0</sub>, P<sub>0.5</sub>, and P<sub>0.75</sub> compositions

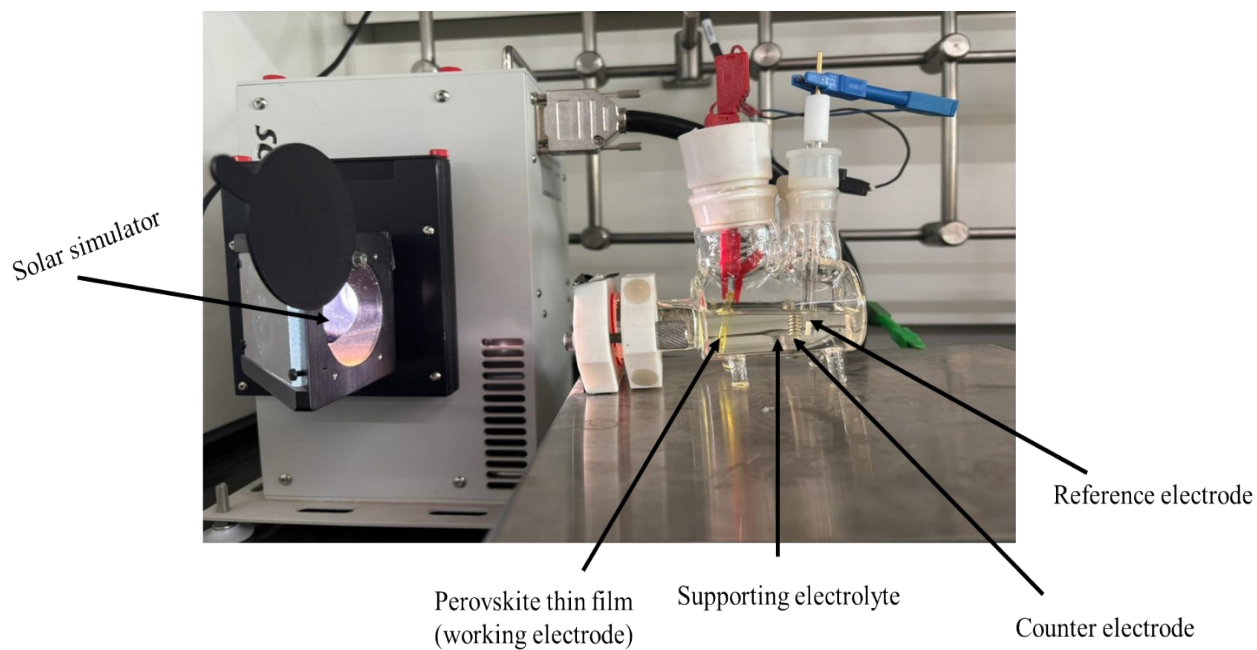

Fig. S6: Photoelectrochemical reaction setup

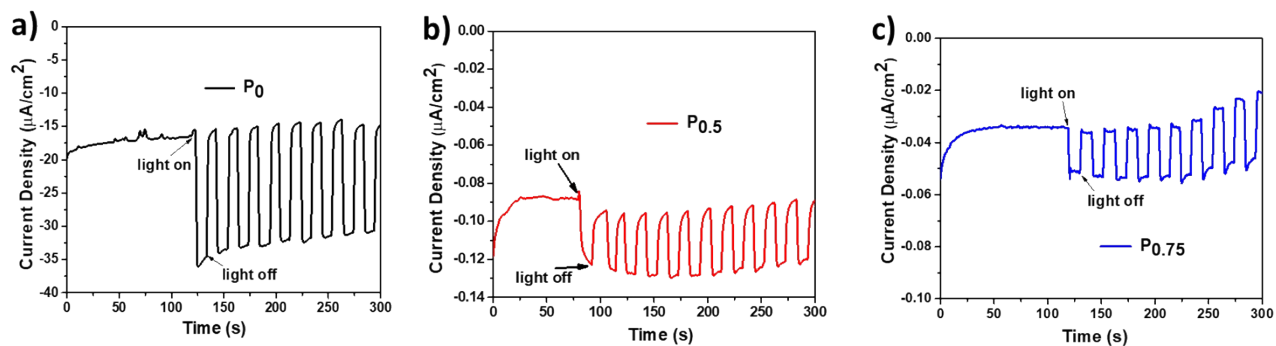

Fig. S7: The chronoamperometric curves (without c-TiO<sub>2</sub> layer) of a)  $P_0$ , b)  $P_{0.5}$ , and c)  $P_{0.75}$  thin film compositions

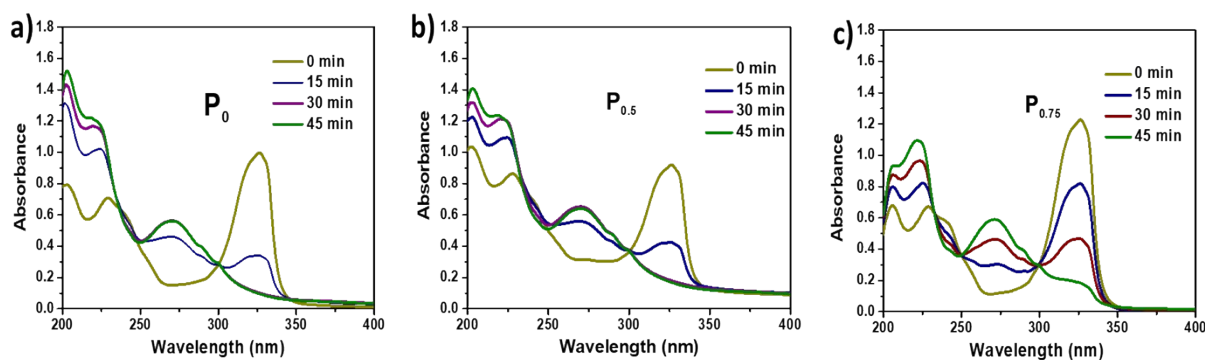

Fig. S8: The absorption curve of MBT dye at 15-minute intervals when a)  $P_0$ , b)  $P_{0.5}$ , and c)  $P_{0.75}$  thin film compositions were used for photocatalysis.

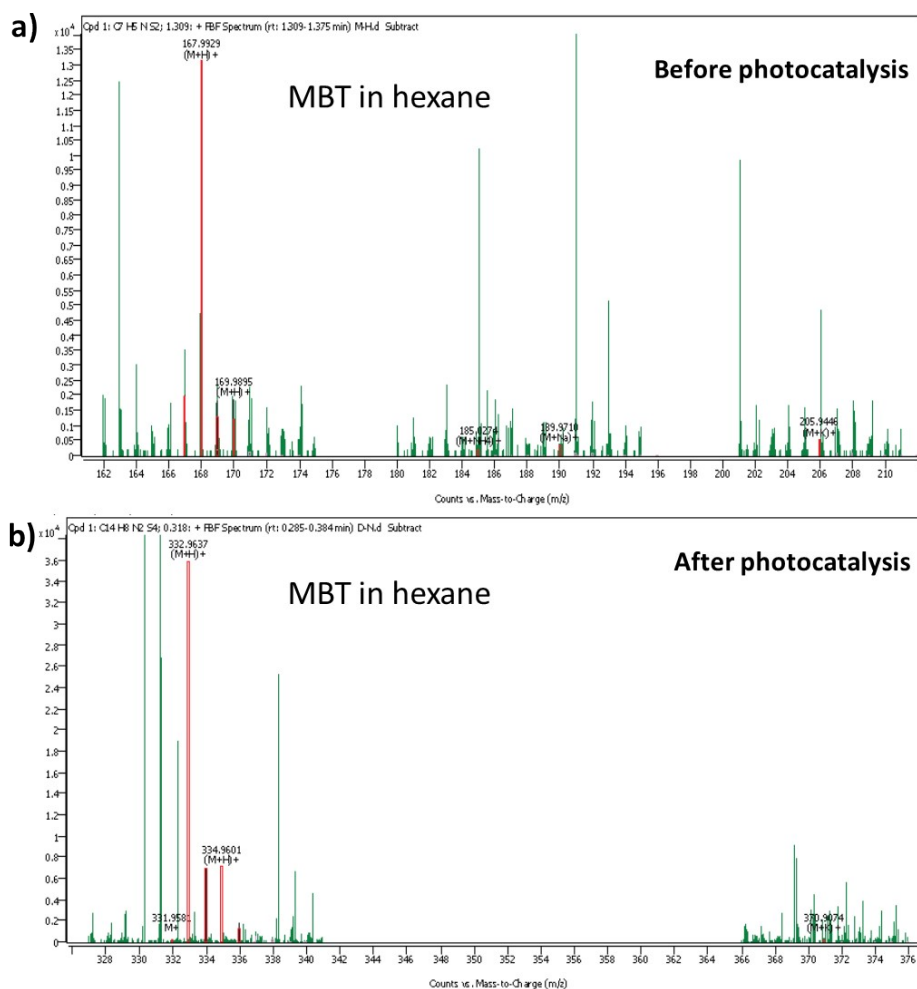

Fig. S9: ESI-MS data of MBT dye in hexane a) before photocatalysis (peak identified at  $m/z=167.9929$  corresponds to the MBT) and b) after photocatalysis (the new peak observed at  $m/z = 332.9636$  counts corresponds to the MBTS).
